# Supplementary material for: Controlled generation of submicron emulsion droplets via highly stable tip-streaming mode in microfluidic devices
Source: Royal Society of Chemistry journal article supplement (doi:10.1039/c2lc00018k), 2012-01-01
Supplement: c2lc00018k.pdf [file c2lc00018k.pdf]

## Electronic Supplementary Information (ESI)

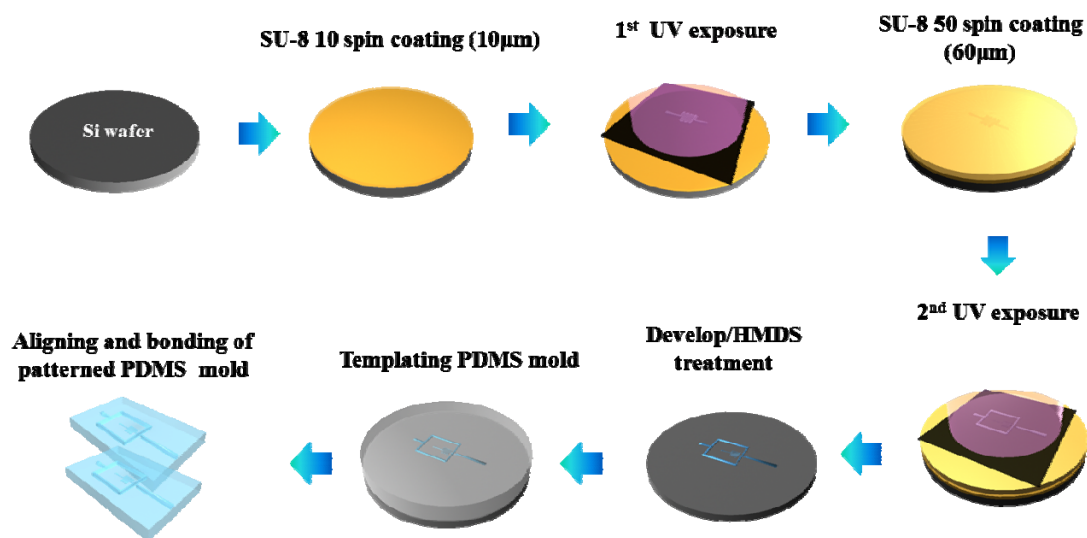

**Fig. S1.** Schematic illustration of the multi-step lithography process. The SU-8 masters with 3-D topography were fabricated by conventional two-step photolithography procedures. Complementary masters were used to prepare two PDMS microchannels that were mirror image structures of one another, which could be brought together to form a 3-D microchannel device.

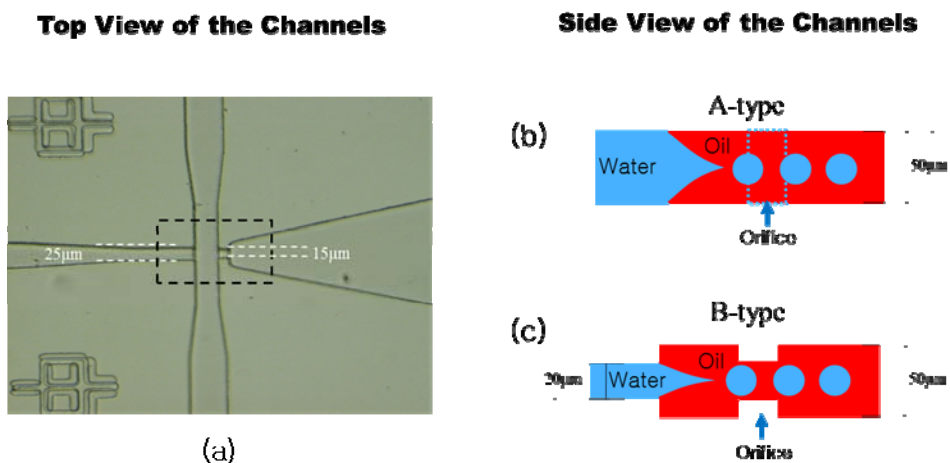

**Fig. S2.** (a) Top and (b-c) side views for the two different microfluidic flow-focusing devices. (b) A-type: Conventional 2-D geometry which the channel height is uniform throughout the microchannels. (c) B-type: The dispersed phase (water) channel and orifice are lower in height than the continuous (oil) phase and downstream channel.

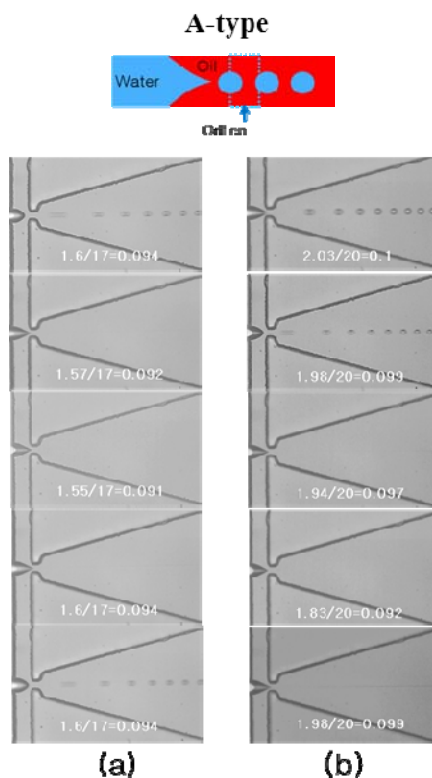

**Fig. S3.** Representative still images of the droplet breakup processes of the A-type microfluidic flow-focusing device at the indicated pressure ratios ( $P_w/P_o$ ). The inner fluid was distilled water and the outer fluid was mineral oil containing a 3 wt% silicone-based nonionic surfactant (ABIL EM90). After adjusting the inlet pressures, droplet breakup was allowed to come to equilibrium for several minutes. (a) The tip-streaming phenomenon did not occur until the oil pressure reached to 17 psi. At the pressure ratio ( $P_w/P_o$ ) of 1.57/17, the visible thread ejected from a highly cusped tip was first observed. However, when the water pressure was decreased to  $P_w/P_o = 1.55/17$ , no thread formation was observed. At this moment, we changed our scanning direction and increased the water pressure to see the general feature of the onset of tip-streaming in a wider range of the pressure ratio ( $P_w/P_o$ ). Indeed, when the pressure ratio  $P_w/P_o$  reached to 1.6/17, thicker thread was created in the tip-streaming mode. This behavior was transient and showed the transition to the dripping mode after 3 minutes. (b) At the oil pressure of 20 psi, the visible thread of the tip-streaming mode was observed in the very narrow range between  $P_w/P_o = 1.96/20$  and  $P_w/P_o = 1.92/20$ . Again, the increase in water pressure from  $P_w/P_o = 1.83/20$  to  $P_w/P_o = 1.98/20$  created the stable tip-streaming mode without transition to the dripping mode.

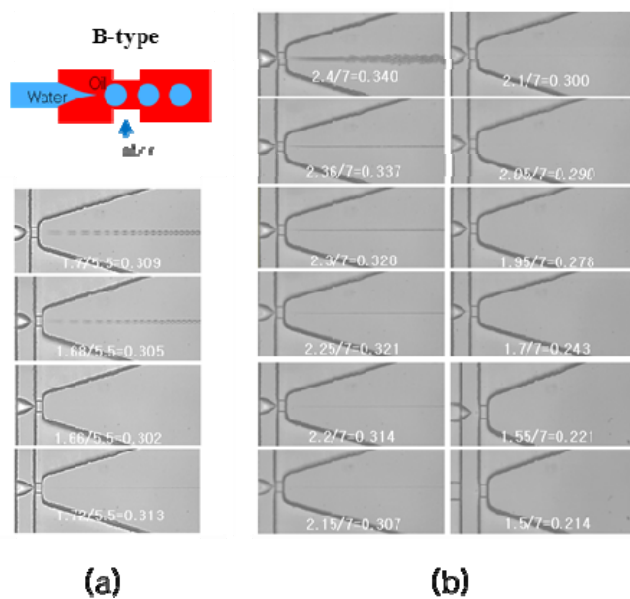

**Fig. S4.** Representative still images of the droplet breakup processes of the B-type microfluidic flow-focusing device at the indicated pressure ratios ( $P_w/P_o$ ). Compared with the A-type geometry in Fig. S3, the B-type geometry suggests a fundamental difference in the droplet break-up. A set of images showed that droplet generation in the tip-streaming mode was very stable in a broader range of pressure. (a) The visible tip-streaming thread was first observed by increasing the water pressure from  $P_w/P_o = 1.66/5.5$  at which a stagnant conical tip was formed but no thread formation was observed. The increase in the water pressure to  $P_w/P_o = 1.72/5.5$  created the stable thread in the tip-streaming mode. (see Movie clip S3) (b) This geometry had the broad tip-streaming range from  $P_w/P_o = 2.36/7$  to  $P_w/P_o = 1.95/7$ . Below the pressure ratio of  $P_w/P_o = 1.95/7$ , the dispersed phase fluid pressure was too low to penetrate into the orifice after contraction. As the pressure ratio decreased, the conical tip gradually retracted over a wide pressure range due to the increasing effect of the continuous phase flow.

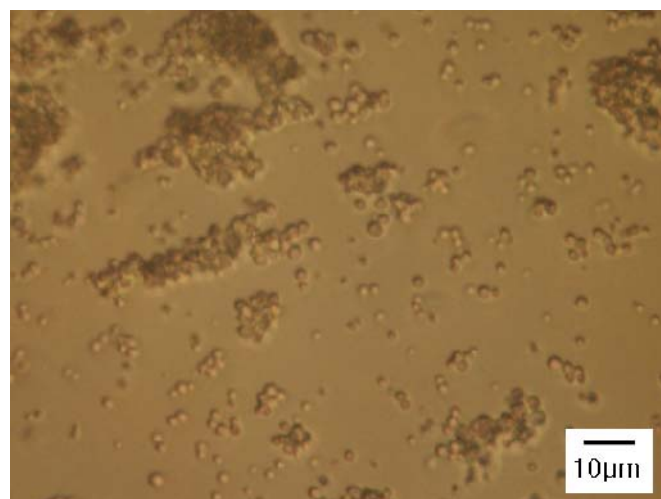

**Fig. S5.** Optical image of polydisperse water droplets produced from the B-type geometry at 2.3/7 (Pw/Po).

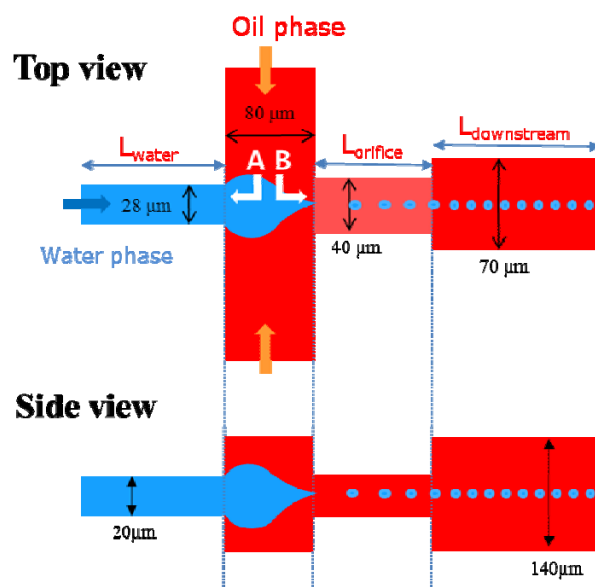

(a)

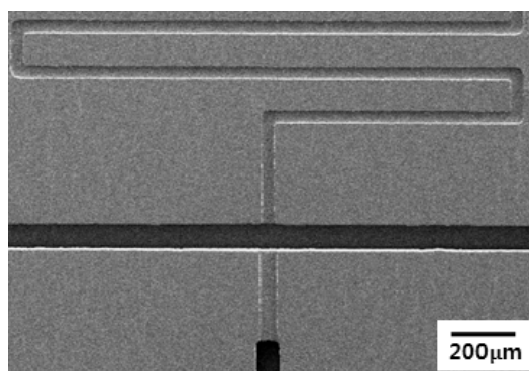

(b)

**Fig. S6.** (a) The hydraulic resistances in each channel path were calculated using Eq. (1). Here, capillary effects on the water and oil fluids within the hydrophobic PDMS channels were not considered. The hydraulic resistance along path **A** ( $R_{\text{water channel}}$ ) was  $1.53 \times 10^{15} \text{ Pa}\cdot\text{s}/\text{m}^3$ , and the hydraulic resistance along path **B** ( $= R_{\text{orifice}} + R_{\text{downstream}}$ ) was  $(7.59 \times 10^{14} + 9.66 \times 10^{12}) \text{ Pa}\cdot\text{s}/\text{m}^3$ . In the case of the flat channels with a constant height ( $20 \mu\text{m}$ ), the hydraulic resistance in the downstream direction ( $R_{\text{downstream}}$ ) was  $2.44 \times 10^{15} \text{ Pa}\cdot\text{s}/\text{m}^3$ . (b) SEM image of a PDMS mold prepared from an SU-8 master with 3-D topography. The high-contrast region is  $70 \mu\text{m}$  in height and the low-contrast region is  $10 \mu\text{m}$  in height.

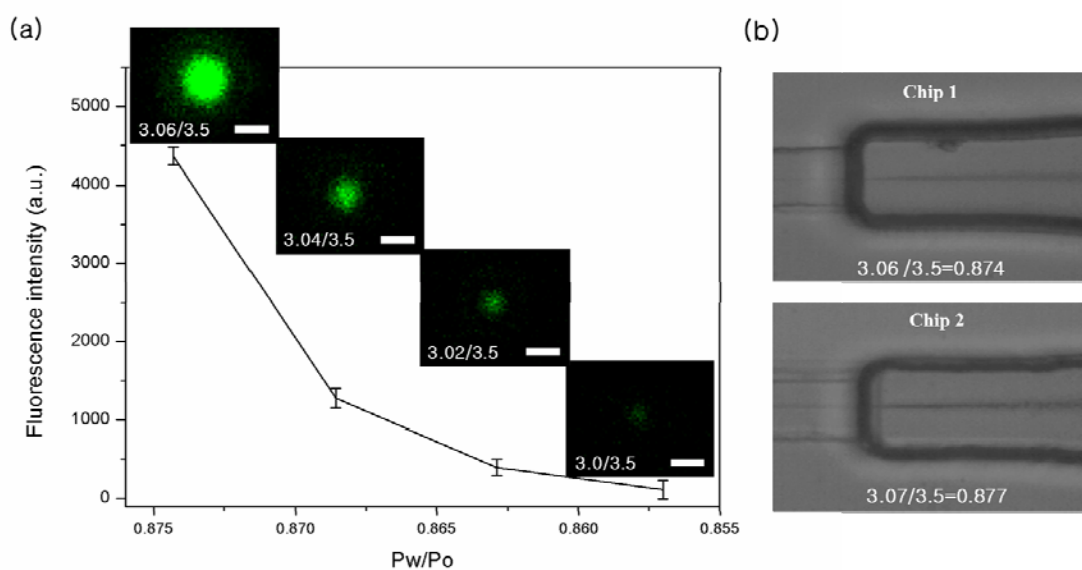

**Fig. S7.** (a) Representative confocal laser scanning microscopy images of submicron emulsion droplets prepared with Chip 1 at the indicated pressure ratios ( $P_w/P_o$ ). The scale bars in each image are 1  $\mu\text{m}$ . In order to calculate average fluorescence intensity, we measured the fluorescence intensity of 50 emulsion droplets for each sample. (b) Still images at dripping-to-tipstreaming transition points for chip 1 and 2, respectively. The error from device-to-device variability was as small as 0.01 psi.

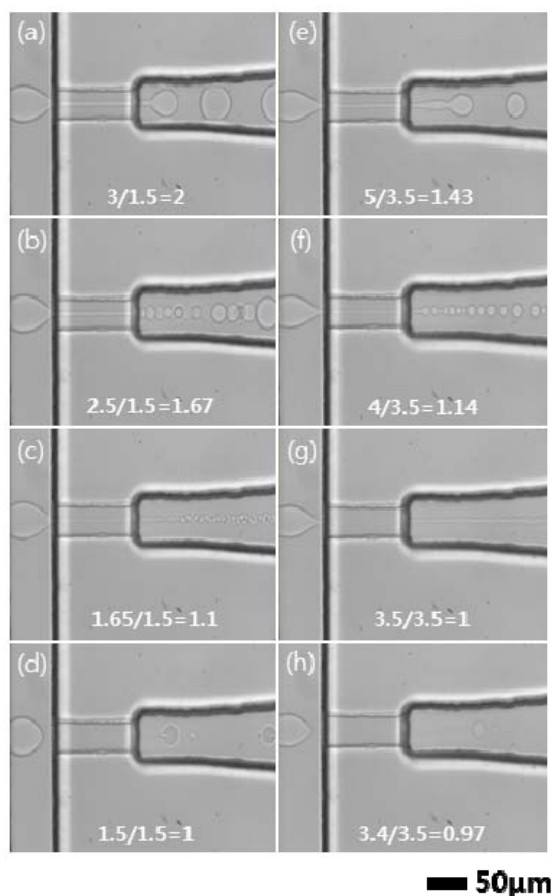

**Fig. S8.** Representative still images of the droplet breakup processes at the indicated pressure ratios ( $P_w/P_o$ ), including the (a, e) stable jetting, (b, f) unstable jetting, (c, g) tip-streaming, and (d, h) unstable regime. The inner fluid is PEG-DA ( $M_n = 700$ ) and the outer fluid is mineral oil containing a 3 wt% silicone-based nonionic surfactant (ABIL EM90). The scale bar is 50  $\mu\text{m}$  at the bottom. Each image presents a close-up view near the orifice, and images are recorded using a high-speed camera at a frame rate of 1 kHz (see Movie clip S2 in Supplementary information).



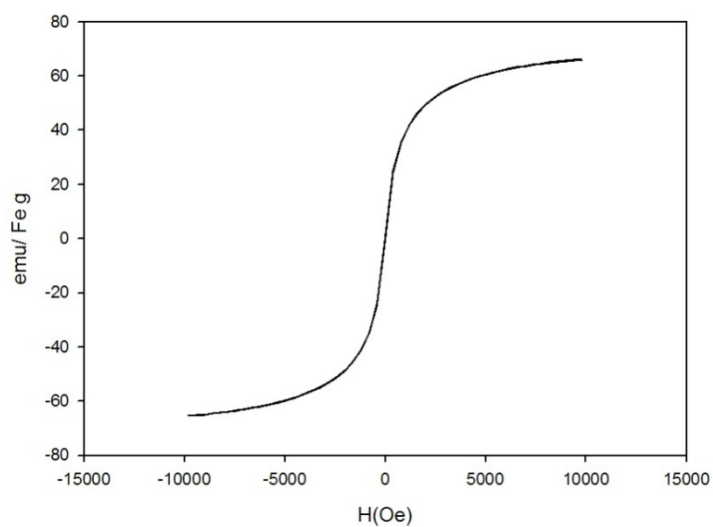

**Fig. S9.** Magnetization (H) of 8 nm magnetic nanoparticles with hydroxyl groups as a function of magnetic field strength (H), which was measured in vibrating sample magnetometer (VSM).

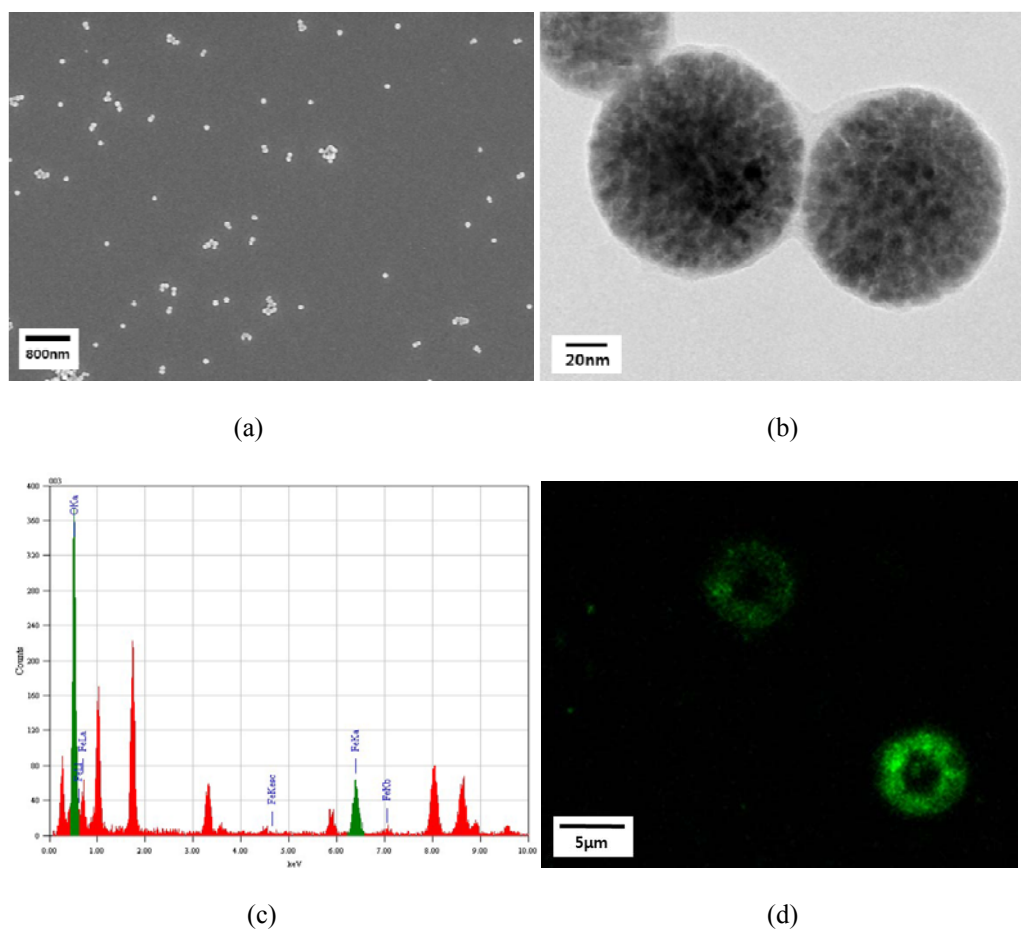

**Fig. S10.** (a) SEM and (b) TEM images, and (c) energy-dispersive X-ray (EDAX) analysis of composite PEG particles with magnetic nanoparticles, in which size distribution was broad because magnetic nanoparticles with hydroxyl group were not stable in PEG-DA. (d) Confocal laser scanning microscopy image showed core-shell structure of composite PEG particles in mineral oil, in which magnetic nanoparticles were aggregated forming central cores during evaporation and FITC-dextran became shell surrounding cores.
